# Supplementary material
Source: MDPI journal article supplement (https://www.mdpi.com/2571-9394/4/1/16)
Supplement: s1 [file s1]

**Table S1**  
**Descriptive statistics for commodity futures returns and the factors**

| <i>Panel A</i>  | <b>Commodity Futures Returns</b> |               |                               |                 |                            |
|-----------------|----------------------------------|---------------|-------------------------------|-----------------|----------------------------|
|                 | <b>Mean</b>                      | <b>Median</b> | <b>Standard<br/>Deviation</b> | <b>Skewness</b> | <b>Excess<br/>Kurtosis</b> |
| Light Crude Oil | 0.0076                           | 0.0085        | 0.0863                        | 0.2767          | 2.3781                     |
| Corn            | 0.0037                           | 0.0000        | 0.0745                        | 0.1767          | 0.7107                     |
| Soybeans        | 0.0030                           | 0.0000        | 0.0686                        | -0.2925         | 1.1918                     |
| Wheat           | 0.0039                           | -0.0014       | 0.0808                        | 0.6681          | 2.6618                     |
| Coffee          | 0.0045                           | -0.0095       | 0.1030                        | 1.0986          | 3.3857                     |
| Cocoa           | 0.0049                           | 0.0000        | 0.0832                        | 0.4364          | 0.8958                     |
| Sugar           | 0.0041                           | -0.0010       | 0.0860                        | 0.3372          | 0.9646                     |
| Cotton No.2     | 0.0042                           | 0.0054        | 0.0756                        | 0.1088          | 0.4408                     |
| Gold            | 0.0043                           | 0.0003        | 0.0446                        | 0.1784          | 1.2249                     |
| Silver          | 0.0060                           | -0.0017       | 0.0798                        | 0.1315          | 0.9535                     |
| Platinum        | 0.0037                           | 0.0032        | 0.0614                        | 0.2097          | 7.5443                     |
| Orange Juice    | 0.0041                           | 0.0047        | 0.0904                        | 0.5444          | 1.1074                     |
| Lumber          | 0.0062                           | 0.0029        | 0.0784                        | 0.3930          | 0.3594                     |
| Live Cattle     | 0.0019                           | 0.0028        | 0.0446                        | -0.7534         | 3.4675                     |

| <i>Panel B</i>  | <b>Hedging Pressure</b> |               |                               |                 |                            |
|-----------------|-------------------------|---------------|-------------------------------|-----------------|----------------------------|
|                 | <b>Mean</b>             | <b>Median</b> | <b>Standard<br/>Deviation</b> | <b>Skewness</b> | <b>Excess<br/>Kurtosis</b> |
| Light Crude Oil | 0.0550                  | 0.0421        | 0.1002                        | 0.1521          | -0.4743                    |
| Corn            | 0.0167                  | 0.0170        | 0.1322                        | -0.1640         | -0.7475                    |
| Soybeans        | 0.1015                  | 0.1277        | 0.1633                        | -0.2676         | -0.7006                    |
| Wheat           | 0.0177                  | -0.0116       | 0.1555                        | 0.4744          | -0.7753                    |
| Coffee          | 0.1338                  | 0.1351        | 0.1588                        | -0.0382         | -1.0892                    |
| Cocoa           | 0.1344                  | 0.1416        | 0.1596                        | -0.1174         | -0.5712                    |
| Sugar           | 0.1656                  | 0.1929        | 0.1888                        | -0.0703         | -0.6391                    |
| Cotton No.2     | 0.0905                  | 0.1114        | 0.2255                        | -0.3090         | -0.8422                    |
| Gold            | 0.2051                  | 0.3013        | 0.2801                        | -0.6206         | -0.9246                    |
| Silver          | 0.3971                  | 0.4060        | 0.1561                        | -0.1283         | -0.5484                    |
| Platinum        | 0.4553                  | 0.5010        | 0.2346                        | -0.6685         | -0.3273                    |
| Orange Juice    | 0.2035                  | 0.2385        | 0.2500                        | -0.4662         | -0.4220                    |
| Lumber          | 0.0735                  | 0.0521        | 0.2000                        | 0.0721          | -0.7776                    |
| Live Cattle     | 0.0638                  | 0.0517        | 0.1066                        | 0.0835          | -0.9132                    |

**Table S1 (continued)**  
**Descriptive statistics for commodity futures returns and the factors**

| <i>Panel C</i>  | <b>Basis</b> |               |                               |                 |                            |
|-----------------|--------------|---------------|-------------------------------|-----------------|----------------------------|
|                 | <b>Mean</b>  | <b>Median</b> | <b>Standard<br/>Deviation</b> | <b>Skewness</b> | <b>Excess<br/>Kurtosis</b> |
| Light Crude Oil | -0.0011      | -0.0024       | 0.0197                        | -0.3821         | 3.6552                     |
| Corn            | -0.0197      | -0.0239       | 0.0316                        | 3.4492          | 19.9205                    |
| Soybeans        | -0.0014      | -0.0070       | 0.0223                        | 2.6293          | 8.8736                     |
| Wheat           | -0.0211      | -0.0258       | 0.0313                        | 1.6318          | 4.1943                     |
| Coffee          | -0.0164      | -0.0206       | 0.0301                        | 1.7687          | 5.5912                     |
| Cocoa           | -0.0113      | -0.0104       | 0.0202                        | 0.0490          | 1.2644                     |
| Sugar           | -0.0008      | -0.0048       | 0.0496                        | -0.0433         | 4.3632                     |
| Cotton No.2     | -0.0104      | -0.0150       | 0.0401                        | 2.0345          | 12.2371                    |
| Gold            | -0.0025      | -0.0023       | 0.0019                        | -0.6186         | -0.2280                    |
| Silver          | 0.0010       | -0.0024       | 0.0519                        | 13.1632         | 172.8415                   |
| Platinum        | 0.0293       | -0.0007       | 0.1687                        | 5.5658          | 29.3783                    |
| Orange Juice    | -0.0086      | -0.0093       | 0.0292                        | 0.6862          | 0.6978                     |
| Lumber          | -0.0215      | -0.0174       | 0.0459                        | -0.0647         | 0.5445                     |
| Live Cattle     | 0.0029       | 0.0003        | 0.0356                        | 0.4074          | 0.0202                     |

| <i>Panel D</i>  | <b>Net Trading</b> |               |                               |                 |                            |
|-----------------|--------------------|---------------|-------------------------------|-----------------|----------------------------|
|                 | <b>Mean</b>        | <b>Median</b> | <b>Standard<br/>Deviation</b> | <b>Skewness</b> | <b>Excess<br/>Kurtosis</b> |
| Light Crude Oil | 0.0086             | 0.0058        | 0.0510                        | 0.2517          | 1.3783                     |
| Corn            | 0.0069             | 0.0026        | 0.0758                        | -0.0493         | 8.3574                     |
| Soybeans        | 0.0080             | 0.0096        | 0.0820                        | -0.3949         | 4.2786                     |
| Wheat           | 0.0080             | 0.0015        | 0.0894                        | 0.0856          | 5.2694                     |
| Coffee          | 0.0116             | 0.0210        | 0.0975                        | 0.3201          | 0.6292                     |
| Cocoa           | 0.0082             | 0.0095        | 0.0760                        | 0.0294          | 0.8178                     |
| Sugar           | 0.0082             | 0.0055        | 0.0767                        | -0.1195         | 0.2702                     |
| Cotton No.2     | 0.0117             | 0.0117        | 0.1012                        | 0.2508          | 1.5604                     |
| Gold            | 0.0070             | -0.0006       | 0.0943                        | 0.5189          | 1.2594                     |
| Silver          | 0.0061             | 0.0011        | 0.0803                        | 0.7065          | 2.0992                     |
| Platinum        | 0.0108             | 0.0107        | 0.1081                        | 0.4331          | 0.8757                     |
| Orange Juice    | 0.0067             | 0.0040        | 0.1109                        | 0.4007          | 0.7497                     |
| Lumber          | 0.0104             | -0.0026       | 0.1481                        | 1.9518          | 12.6281                    |
| Live Cattle     | 0.0083             | 0.0041        | 0.0746                        | 0.2013          | 0.2940                     |

| <i>Panel E</i>   | <b>Aggregate Commodity Specific Factors</b> |               |                               |                 |                            |
|------------------|---------------------------------------------|---------------|-------------------------------|-----------------|----------------------------|
|                  | <b>Mean</b>                                 | <b>Median</b> | <b>Standard<br/>Deviation</b> | <b>Skewness</b> | <b>Excess<br/>Kurtosis</b> |
| Hedging Pressure | 0.0975                                      | 0.1002        | 0.0772                        | -0.2829         | -0.3088                    |
| Basis            | -0.0055                                     | -0.0073       | 0.0143                        | 2.0651          | 7.4183                     |
| Net Trading      | 0.0051                                      | 0.0045        | 0.0414                        | -1.6270         | 16.6478                    |

Table S2

## Optimal Asset Allocation – Hidden Markov Models

|                             | No Transaction Costs                            |                 |                | With Transaction Costs |                 |                |
|-----------------------------|-------------------------------------------------|-----------------|----------------|------------------------|-----------------|----------------|
|                             | Macro Principal Components Only                 |                 |                |                        |                 |                |
|                             | $\gamma = 0.1$                                  | $\gamma = 0.25$ | $\gamma = 0.5$ | $\gamma = 0.1$         | $\gamma = 0.25$ | $\gamma = 0.5$ |
| Average Realized Return     | 0.0001                                          | -0.0001         | -0.0001        | 0.0006                 | -0.0014         | -0.0012        |
| Realized Standard Deviation | 0.0275                                          | 0.0267          | 0.0262         | 0.0301                 | 0.0306          | 0.0304         |
| Annualized Sharpe Ratio     | 0.0067                                          | -0.0106         | -0.0128        | 0.0660                 | -0.1631         | -0.1397        |
| Realized Average MV Utility | 0.0000                                          | -0.0002         | -0.0003        | 0.0005                 | -0.0016         | -0.0015        |
|                             | Average Portfolio Weights                       |                 |                |                        |                 |                |
| Light Crude Oil             | 0.0145                                          | 0.0113          | 0.0081         | 0.0319                 | 0.0254          | 0.0195         |
| Corn                        | -0.0037                                         | -0.0060         | -0.0006        | -0.0425                | -0.0468         | -0.0376        |
| Soybeans                    | 0.0008                                          | 0.0103          | 0.0081         | -0.0164                | -0.0014         | -0.0028        |
| Wheat                       | 0.0034                                          | 0.0014          | -0.0016        | 0.0650                 | 0.0635          | 0.0579         |
| Coffee                      | -0.0031                                         | -0.0050         | -0.0060        | 0.0011                 | -0.0023         | -0.0049        |
| Cocoa                       | 0.0002                                          | -0.0025         | -0.0015        | -0.0023                | -0.0057         | -0.0066        |
| Sugar                       | 0.0034                                          | 0.0039          | 0.0016         | 0.0155                 | 0.0146          | 0.0096         |
| Cotton No.2                 | 0.0072                                          | 0.0019          | -0.0006        | 0.0270                 | 0.0178          | 0.0107         |
| Gold                        | 0.0063                                          | -0.0065         | -0.0082        | -0.0221                | -0.0391         | -0.0440        |
| Silver                      | -0.0025                                         | -0.0022         | -0.0004        | 0.0075                 | 0.0092          | 0.0131         |
| Platinum                    | 0.0221                                          | 0.0235          | 0.0217         | 0.0210                 | 0.0199          | 0.0216         |
| Orange Juice                | 0.0039                                          | 0.0036          | 0.0023         | 0.0052                 | 0.0057          | 0.0033         |
| Lumber                      | 0.0105                                          | 0.0036          | 0.0034         | -0.0159                | -0.0259         | -0.0251        |
| Live Cattle                 | -0.0050                                         | -0.0035         | -0.0009        | -0.0163                | -0.0134         | -0.0078        |
| S&P500                      | -0.0158                                         | -0.0043         | -0.0025        | 0.0136                 | 0.0435          | 0.0502         |
| 10Y Treasury Bond           | 0.9578                                          | 0.9705          | 0.9770         | 0.9277                 | 0.9348          | 0.9429         |
|                             | Macro Principal Components + Commodity-Specific |                 |                |                        |                 |                |
|                             | $\gamma = 0.1$                                  | $\gamma = 0.25$ | $\gamma = 0.5$ | $\gamma = 0.1$         | $\gamma = 0.25$ | $\gamma = 0.5$ |
| Rendimento Mensile Medio    | 0.0020                                          | 0.0000          | 0.0018         | 0.0028                 | 0.0011          | 0.0018         |
| Deviazione Standard Mensile | 0.0455                                          | 0.0422          | 0.0358         | 0.0408                 | 0.0363          | 0.0296         |
| Sharpe Ratio Annuo          | 0.1516                                          | 0.0023          | 0.1770         | 0.2340                 | 0.1039          | 0.2077         |
| Utilità Media-Varianza      | 0.0019                                          | -0.0002         | 0.0015         | 0.0027                 | 0.0009          | 0.0016         |
|                             | Average Portfolio Weights                       |                 |                |                        |                 |                |
| Light Crude Oil             | 0.0014                                          | 0.0011          | 0.0018         | 0.0012                 | -0.0030         | -0.0024        |
| Corn                        | -0.0029                                         | -0.0053         | -0.0192        | 0.0360                 | 0.0315          | 0.0029         |
| Soybeans                    | 0.0091                                          | 0.0052          | 0.0223         | -0.0241                | -0.0293         | 0.0076         |
| Wheat                       | 0.0077                                          | 0.0090          | 0.0094         | -0.0019                | 0.0040          | -0.0003        |
| Coffee                      | -0.0024                                         | -0.0024         | -0.0040        | 0.0231                 | 0.0224          | 0.0162         |
| Cocoa                       | 0.0023                                          | -0.0013         | 0.0031         | -0.0038                | -0.0073         | 0.0050         |
| Sugar                       | 0.0034                                          | 0.0012          | 0.0003         | 0.0116                 | 0.0057          | 0.0026         |
| Cotton No.2                 | 0.0014                                          | -0.0037         | -0.0064        | 0.0098                 | 0.0077          | 0.0044         |
| Gold                        | -0.0064                                         | -0.0013         | -0.0208        | 0.0260                 | 0.0171          | -0.0160        |
| Silver                      | 0.0077                                          | 0.0101          | 0.0209         | 0.0031                 | -0.0012         | 0.0164         |
| Platinum                    | 0.0109                                          | 0.0100          | 0.0087         | -0.0086                | 0.0034          | 0.0048         |
| Orange Juice                | 0.0065                                          | 0.0047          | 0.0053         | -0.0088                | -0.0065         | -0.0005        |
| Lumber                      | 0.0048                                          | 0.0067          | 0.0028         | -0.0008                | -0.0011         | -0.0110        |
| Live Cattle                 | -0.0082                                         | -0.0027         | -0.0027        | 0.0158                 | 0.0174          | 0.0181         |
| S&P500                      | -0.0112                                         | -0.0111         | -0.0118        | 0.0384                 | 0.0312          | 0.0383         |
| 10Y Treasury Bond           | 0.9760                                          | 0.9798          | 0.9904         | 0.8828                 | 0.9081          | 0.9140         |

**Table S2 (continued)**

**Optimal Asset Allocation – Hidden Markov Models**

|                             | No Transaction Costs                                 |                 |                | With Transaction Costs |                 |                |
|-----------------------------|------------------------------------------------------|-----------------|----------------|------------------------|-----------------|----------------|
|                             | Principal Components + Aggregated Commodity-Specific |                 |                |                        |                 |                |
|                             | $\gamma = 0.1$                                       | $\gamma = 0.25$ | $\gamma = 0.5$ | $\gamma = 0.1$         | $\gamma = 0.25$ | $\gamma = 0.5$ |
| Rendimento Mensile Medio    | 0.0028                                               | 0.0012          | 0.0012         | 0.0024                 | 0.0027          | 0.0027         |
| Deviazione Standard Mensile | 0.0383                                               | 0.0287          | 0.0290         | 0.0473                 | 0.0277          | 0.0288         |
| Sharpe Ratio Annuo          | 0.2496                                               | 0.1426          | 0.1437         | 0.1727                 | 0.3362          | 0.3210         |
| Utilità Media-Varianza      | 0.0027                                               | 0.0011          | 0.0010         | 0.0022                 | 0.0026          | 0.0025         |
|                             | Avrg. Weights                                        |                 |                | Avrg. Weights          |                 |                |
| Light Crude Oil             | 0.0076                                               | -0.0002         | -0.0047        | 0.0067                 | 0.0025          | 0.0026         |
| Corn                        | 0.0245                                               | 0.0119          | 0.0074         | 0.0656                 | 0.0108          | 0.0013         |
| Soybeans                    | -0.0302                                              | -0.0139         | -0.0087        | -0.0267                | 0.0093          | 0.0109         |
| Wheat                       | 0.0140                                               | 0.0094          | 0.0101         | -0.0217                | -0.0019         | 0.0030         |
| Coffee                      | -0.0110                                              | -0.0128         | -0.0142        | -0.0086                | -0.0068         | -0.0094        |
| Cocoa                       | 0.0112                                               | 0.0093          | 0.0068         | 0.0389                 | 0.0185          | 0.0188         |
| Sugar                       | -0.0080                                              | -0.0076         | -0.0057        | 0.0050                 | 0.0086          | 0.0106         |
| Cotton No.2                 | -0.0018                                              | -0.0016         | 0.0003         | 0.0075                 | -0.0118         | -0.0052        |
| Gold                        | 0.0394                                               | 0.0251          | 0.0231         | -0.0085                | -0.0015         | 0.0011         |
| Silver                      | 0.0099                                               | 0.0137          | 0.0112         | 0.0312                 | 0.0062          | 0.0202         |
| Platinum                    | -0.0084                                              | -0.0043         | -0.0023        | -0.0149                | 0.0079          | -0.0061        |
| Orange Juice                | 0.0018                                               | -0.0038         | -0.0035        | 0.0270                 | 0.0008          | 0.0024         |
| Lumber                      | 0.0037                                               | 0.0024          | 0.0002         | -0.0118                | -0.0012         | -0.0059        |
| Live Cattle                 | 0.0422                                               | 0.0362          | 0.0284         | 0.0458                 | 0.0263          | 0.0272         |
| S&P500                      | -0.0181                                              | -0.0156         | -0.0178        | 0.0459                 | 0.0396          | 0.0290         |
| 10Y Treasury Bond           | 0.9233                                               | 0.9518          | 0.9693         | 0.8187                 | 0.8927          | 0.8995         |

Table S3

**Optimal Asset Allocation – Stepwise Regression Models Based on Macro Principal Components Only**

*Panel A (No Transaction Costs)*

|                                  | <b>Forward<br/><math>\gamma = 0.1</math></b> | <b>Backward<br/><math>\gamma = 0.1</math></b> | <b>Forward<br/><math>\gamma = 0.25</math></b> | <b>Backward<br/><math>\gamma = 0.25</math></b> | <b>Forward<br/><math>\gamma = 0.5</math></b> | <b>Backward<br/><math>\gamma = 0.5</math></b> |
|----------------------------------|----------------------------------------------|-----------------------------------------------|-----------------------------------------------|------------------------------------------------|----------------------------------------------|-----------------------------------------------|
| Average Realized Return          | -0.0005                                      | -0.0009                                       | -0.0006                                       | -0.0007                                        | -0.0003                                      | -0.0004                                       |
| Realized Standard Deviation      | 0.0267                                       | 0.0295                                        | 0.0267                                        | 0.0278                                         | 0.0252                                       | 0.0265                                        |
| Annualized Sharpe Ratio          | -0.0588                                      | -0.0998                                       | -0.0774                                       | -0.0906                                        | -0.0421                                      | -0.0466                                       |
| Realized Average MV Utility      | -0.0005                                      | -0.0009                                       | -0.0007                                       | -0.0008                                        | -0.0005                                      | -0.0005                                       |
| <b>Average Portfolio Weights</b> |                                              |                                               |                                               |                                                |                                              |                                               |
| Light Crude Oil                  | 0.0435                                       | 0.0303                                        | 0.0435                                        | 0.0357                                         | 0.0445                                       | 0.0254                                        |
| Corn                             | -0.0098                                      | -0.0470                                       | -0.0114                                       | -0.0540                                        | -0.0120                                      | -0.0408                                       |
| Soybeans                         | -0.0221                                      | 0.0020                                        | -0.0215                                       | 0.0015                                         | -0.0223                                      | -0.0007                                       |
| Wheat                            | -0.0003                                      | 0.0176                                        | 0.0010                                        | 0.0221                                         | 0.0017                                       | 0.0166                                        |
| Coffee                           | 0.0280                                       | 0.0258                                        | 0.0284                                        | 0.0303                                         | 0.0296                                       | 0.0334                                        |
| Cocoa                            | 0.0049                                       | 0.0268                                        | 0.0053                                        | 0.0297                                         | 0.0057                                       | 0.0234                                        |
| Sugar                            | 0.0168                                       | 0.0070                                        | 0.0171                                        | 0.0059                                         | 0.0178                                       | 0.0074                                        |
| Cotton No.2                      | 0.0124                                       | 0.0124                                        | 0.0130                                        | 0.0195                                         | 0.0136                                       | 0.0213                                        |
| Gold                             | -0.0704                                      | -0.0976                                       | -0.0661                                       | -0.1106                                        | -0.0699                                      | -0.1148                                       |
| Silver                           | 0.0308                                       | 0.0405                                        | 0.0296                                        | 0.0484                                         | 0.0309                                       | 0.0543                                        |
| Platinum                         | -0.0114                                      | -0.0071                                       | -0.0124                                       | -0.0151                                        | -0.0134                                      | -0.0152                                       |
| Orange Juice                     | 0.0166                                       | 0.0217                                        | 0.0167                                        | 0.0247                                         | 0.0173                                       | 0.0338                                        |
| Lumber                           | 0.0320                                       | 0.0243                                        | 0.0312                                        | 0.0289                                         | 0.0319                                       | 0.0313                                        |
| Live Cattle                      | 0.0146                                       | 0.0217                                        | 0.0132                                        | 0.0218                                         | 0.0136                                       | 0.0306                                        |
| S&P500                           | 0.0499                                       | 0.0519                                        | 0.0474                                        | 0.0349                                         | 0.0444                                       | 0.0123                                        |
| 10Y Treasury Bond                | 0.8646                                       | 0.8699                                        | 0.8650                                        | 0.8763                                         | 0.8666                                       | 0.8816                                        |

*Panel B (With Transaction Costs)*

|                                  | <b>Forward<br/><math>\gamma = 0.1</math></b> | <b>Backward<br/><math>\gamma = 0.1</math></b> | <b>Forward<br/><math>\gamma = 0.25</math></b> | <b>Backward<br/><math>\gamma = 0.25</math></b> | <b>Forward<br/><math>\gamma = 0.5</math></b> | <b>Backward<br/><math>\gamma = 0.5</math></b> |
|----------------------------------|----------------------------------------------|-----------------------------------------------|-----------------------------------------------|------------------------------------------------|----------------------------------------------|-----------------------------------------------|
| Rendimento Mensile Medio         | 0.0038                                       | 0.0038                                        | 0.0032                                        | 0.0037                                         | 0.0032                                       | 0.0041                                        |
| Deviazione Standard Mensile      | 0.0353                                       | 0.0412                                        | 0.0353                                        | 0.0410                                         | 0.0351                                       | 0.0398                                        |
| Sharpe Ratio Annuo               | 0.3736                                       | 0.3222                                        | 0.3187                                        | 0.3094                                         | 0.3186                                       | 0.3526                                        |
| Utilità Media-Varianza           | 0.0037                                       | 0.0038                                        | 0.0031                                        | 0.0035                                         | 0.0029                                       | 0.0037                                        |
| <b>Average Portfolio Weights</b> |                                              |                                               |                                               |                                                |                                              |                                               |
| Light Crude Oil                  | 0.0295                                       | 0.0796                                        | 0.0326                                        | 0.0907                                         | 0.0325                                       | 0.0940                                        |
| Corn                             | -0.0279                                      | -0.0857                                       | -0.0280                                       | -0.0953                                        | -0.0279                                      | -0.0807                                       |
| Soybeans                         | -0.0362                                      | -0.1175                                       | -0.0308                                       | -0.1348                                        | -0.0309                                      | -0.1775                                       |
| Wheat                            | -0.0275                                      | 0.0348                                        | -0.0284                                       | 0.0406                                         | -0.0283                                      | 0.0339                                        |
| Coffee                           | 0.0356                                       | 0.1279                                        | 0.0349                                        | 0.1430                                         | 0.0348                                       | 0.1836                                        |
| Cocoa                            | 0.0266                                       | 0.1050                                        | 0.0230                                        | 0.1167                                         | 0.0229                                       | 0.1327                                        |
| Sugar                            | 0.0121                                       | 0.0078                                        | 0.0131                                        | 0.0049                                         | 0.0131                                       | 0.0074                                        |
| Cotton No.2                      | 0.0279                                       | 0.1732                                        | 0.0264                                        | 0.2022                                         | 0.0262                                       | 0.2588                                        |
| Gold                             | -0.0350                                      | -0.4650                                       | -0.0508                                       | -0.5117                                        | -0.0508                                      | -0.6425                                       |
| Silver                           | 0.0166                                       | 0.2473                                        | 0.0243                                        | 0.2786                                         | 0.0242                                       | 0.3585                                        |
| Platinum                         | -0.1158                                      | -0.3760                                       | -0.1134                                       | -0.4337                                        | -0.1130                                      | -0.5666                                       |
| Orange Juice                     | 0.0364                                       | 0.1195                                        | 0.0382                                        | 0.1321                                         | 0.0380                                       | 0.1716                                        |
| Lumber                           | 0.0339                                       | 0.0320                                        | 0.0349                                        | 0.0364                                         | 0.0347                                       | 0.0406                                        |
| Live Cattle                      | 0.0210                                       | 0.0705                                        | 0.0227                                        | 0.0737                                         | 0.0227                                       | 0.0982                                        |
| S&P500                           | 0.2662                                       | 0.2032                                        | 0.2569                                        | 0.2038                                         | 0.2565                                       | 0.2202                                        |
| 10Y Treasury Bond                | 0.7365                                       | 0.8435                                        | 0.7446                                        | 0.8531                                         | 0.7452                                       | 0.8678                                        |

Table S4

**Optimal Asset Allocation – Stepwise Regression Models Based on Macro Principal Components + Commodity-Specific Factors (Always Included)**

*Panel A (No Transaction Costs)*

|                                  | <b>Forward<br/><math>\gamma = 0.1</math></b> | <b>Backward<br/><math>\gamma = 0.1</math></b> | <b>Forward<br/><math>\gamma = 0.25</math></b> | <b>Backward<br/><math>\gamma = 0.25</math></b> | <b>Forward<br/><math>\gamma = 0.5</math></b> | <b>Backward<br/><math>\gamma = 0.5</math></b> |
|----------------------------------|----------------------------------------------|-----------------------------------------------|-----------------------------------------------|------------------------------------------------|----------------------------------------------|-----------------------------------------------|
| Average Realized Return          | 0.0021                                       | -0.0029                                       | 0.0020                                        | -0.0028                                        | 0.0024                                       | -0.0031                                       |
| Realized Standard Deviation      | 0.0418                                       | 0.0355                                        | 0.0412                                        | 0.0349                                         | 0.0406                                       | 0.0348                                        |
| Annualized Sharpe Ratio          | 0.1734                                       | -0.2842                                       | 0.1700                                        | -0.2808                                        | 0.2063                                       | -0.3123                                       |
| Realized Average MV Utility      | 0.0020                                       | -0.0030                                       | 0.0018                                        | -0.0030                                        | 0.0020                                       | -0.0034                                       |
| <b>Average Portfolio Weights</b> |                                              |                                               |                                               |                                                |                                              |                                               |
| Light Crude Oil                  | 0.0023                                       | 0.0082                                        | 0.0020                                        | 0.0079                                         | 0.0024                                       | 0.0097                                        |
| Corn                             | 0.0780                                       | 0.0814                                        | 0.0765                                        | 0.0859                                         | 0.0768                                       | 0.0763                                        |
| Soybeans                         | -0.0397                                      | 0.0072                                        | -0.0362                                       | 0.0162                                         | -0.0375                                      | 0.0227                                        |
| Wheat                            | -0.0218                                      | -0.0507                                       | -0.0243                                       | -0.0578                                        | -0.0209                                      | -0.0557                                       |
| Coffee                           | 0.0133                                       | 0.0117                                        | 0.0134                                        | 0.0109                                         | 0.0116                                       | 0.0120                                        |
| Cocoa                            | 0.0108                                       | 0.0000                                        | 0.0107                                        | 0.0045                                         | 0.0067                                       | 0.0028                                        |
| Sugar                            | 0.0011                                       | 0.0021                                        | 0.0040                                        | 0.0034                                         | 0.0008                                       | 0.0047                                        |
| Cotton No.2                      | 0.0164                                       | -0.0212                                       | 0.0180                                        | -0.0250                                        | 0.0176                                       | -0.0261                                       |
| Gold                             | 0.0774                                       | 0.0284                                        | 0.0593                                        | 0.0035                                         | 0.0514                                       | -0.0133                                       |
| Silver                           | -0.0291                                      | -0.0241                                       | -0.0136                                       | -0.0122                                        | -0.0111                                      | -0.0092                                       |
| Platinum                         | -0.0067                                      | 0.0593                                        | -0.0243                                       | 0.0627                                         | -0.0161                                      | 0.0784                                        |
| Orange Juice                     | 0.0192                                       | 0.0274                                        | 0.0200                                        | 0.0290                                         | 0.0161                                       | 0.0308                                        |
| Lumber                           | -0.0010                                      | 0.0061                                        | 0.0002                                        | 0.0059                                         | 0.0015                                       | 0.0082                                        |
| Live Cattle                      | 0.0731                                       | 0.0414                                        | 0.0838                                        | 0.0402                                         | 0.0883                                       | 0.0410                                        |
| S&P500                           | -0.0074                                      | -0.0172                                       | -0.0091                                       | -0.0273                                        | -0.0143                                      | -0.0371                                       |
| 10Y Treasury Bond                | 0.8142                                       | 0.8398                                        | 0.8197                                        | 0.8520                                         | 0.8267                                       | 0.8549                                        |

*Panel B (With Transaction Costs)*

|                                  | <b>Forward<br/><math>\gamma = 0.1</math></b> | <b>Backward<br/><math>\gamma = 0.1</math></b> | <b>Forward<br/><math>\gamma = 0.25</math></b> | <b>Backward<br/><math>\gamma = 0.25</math></b> | <b>Forward<br/><math>\gamma = 0.5</math></b> | <b>Backward<br/><math>\gamma = 0.5</math></b> |
|----------------------------------|----------------------------------------------|-----------------------------------------------|-----------------------------------------------|------------------------------------------------|----------------------------------------------|-----------------------------------------------|
| Rendimento Mensile Medio         | 0.0029                                       | -0.0012                                       | 0.0036                                        | -0.0007                                        | 0.0022                                       | -0.0001                                       |
| Deviazione Standard Mensile      | 0.0576                                       | 0.0319                                        | 0.0567                                        | 0.0309                                         | 0.0544                                       | 0.0317                                        |
| Sharpe Ratio Annuo               | 0.1724                                       | -0.1331                                       | 0.2229                                        | -0.0817                                        | 0.1408                                       | -0.0147                                       |
| Utilità Media-Varianza           | 0.0027                                       | -0.0013                                       | 0.0032                                        | -0.0008                                        | 0.0015                                       | -0.0004                                       |
| <b>Average Portfolio Weights</b> |                                              |                                               |                                               |                                                |                                              |                                               |
| Light Crude Oil                  | -0.0176                                      | -0.0267                                       | -0.0147                                       | -0.0273                                        | -0.0159                                      | -0.0271                                       |
| Corn                             | 0.1167                                       | 0.1027                                        | 0.0988                                        | 0.1126                                         | 0.0921                                       | 0.1105                                        |
| Soybeans                         | -0.0885                                      | -0.0366                                       | -0.0733                                       | -0.0778                                        | -0.0635                                      | -0.0646                                       |
| Wheat                            | -0.0326                                      | -0.0800                                       | -0.0327                                       | -0.0624                                        | -0.0314                                      | -0.0722                                       |
| Coffee                           | 0.0234                                       | 0.0267                                        | 0.0310                                        | 0.0220                                         | 0.0294                                       | 0.0248                                        |
| Cocoa                            | 0.0114                                       | 0.0059                                        | 0.0113                                        | -0.0057                                        | 0.0146                                       | -0.0028                                       |
| Sugar                            | -0.0128                                      | 0.0012                                        | 0.0073                                        | 0.0013                                         | 0.0052                                       | -0.0014                                       |
| Cotton No.2                      | -0.0014                                      | -0.0124                                       | 0.0256                                        | -0.0043                                        | 0.0187                                       | -0.0098                                       |
| Gold                             | 0.0819                                       | 0.0412                                        | 0.0948                                        | 0.0821                                         | 0.0775                                       | 0.0719                                        |
| Silver                           | -0.0592                                      | -0.0664                                       | -0.0144                                       | -0.0425                                        | 0.0072                                       | -0.0631                                       |
| Platinum                         | 0.0888                                       | 0.0931                                        | -0.0570                                       | 0.0438                                         | -0.0739                                      | 0.0766                                        |
| Orange Juice                     | 0.0131                                       | 0.0099                                        | 0.0129                                        | 0.0106                                         | 0.0231                                       | 0.0140                                        |
| Lumber                           | -0.0257                                      | -0.0165                                       | -0.0261                                       | -0.0010                                        | -0.0280                                      | -0.0097                                       |
| Live Cattle                      | 0.1471                                       | 0.0225                                        | 0.1282                                        | 0.0267                                         | 0.1309                                       | 0.0152                                        |
| S&P500                           | 0.0594                                       | 0.1271                                        | 0.0825                                        | 0.1114                                         | 0.0839                                       | 0.1254                                        |
| 10Y Treasury Bond                | 0.6961                                       | 0.8084                                        | 0.7259                                        | 0.8105                                         | 0.7300                                       | 0.8125                                        |

Table S5

**Optimal Asset Allocation – Stepwise Regression Models Based on Macro Principal Components + Commodity-Specific Factors**

*Panel A (No Transaction Costs)*

|                                  | Forward<br>$\gamma = 0.1$ | Backward<br>$\gamma = 0.1$ | Forward<br>$\gamma = 0.25$ | Backward<br>$\gamma = 0.25$ | Forward<br>$\gamma = 0.5$ | Backward<br>$\gamma = 0.5$ |
|----------------------------------|---------------------------|----------------------------|----------------------------|-----------------------------|---------------------------|----------------------------|
| Average Realized Return          | -0.0033                   | -0.0022                    | -0.0016                    | -0.0022                     | 0.0000                    | -0.0020                    |
| Realized Standard Deviation      | 0.0359                    | 0.0324                     | 0.0381                     | 0.0324                      | 0.0327                    | 0.0313                     |
| Annualized Sharpe Ratio          | -0.3152                   | -0.2371                    | -0.1419                    | -0.2384                     | -0.0013                   | -0.2218                    |
| Realized Average MV Utility      | -0.0033                   | -0.0023                    | -0.0017                    | -0.0024                     | -0.0003                   | -0.0022                    |
| <b>Average Portfolio Weights</b> |                           |                            |                            |                             |                           |                            |
| Light Crude Oil                  | 0.0091                    | 0.0141                     | 0.0043                     | 0.0111                      | 0.0028                    | -0.0095                    |
| Corn                             | 0.0577                    | 0.0479                     | 0.0554                     | 0.0494                      | 0.0729                    | 0.0170                     |
| Soybeans                         | 0.0057                    | 0.0077                     | -0.0114                    | -0.0170                     | -0.0309                   | 0.0431                     |
| Wheat                            | -0.0443                   | -0.0366                    | -0.0260                    | -0.0221                     | -0.0228                   | 0.0072                     |
| Coffee                           | 0.0013                    | 0.0003                     | 0.0088                     | 0.0025                      | 0.0111                    | -0.0038                    |
| Cocoa                            | 0.0153                    | 0.0013                     | 0.0205                     | 0.0047                      | 0.0158                    | 0.0030                     |
| Sugar                            | 0.0018                    | 0.0125                     | 0.0047                     | 0.0070                      | 0.0011                    | -0.0265                    |
| Cotton No.2                      | -0.0145                   | -0.0001                    | -0.0111                    | -0.0079                     | -0.0021                   | -0.0675                    |
| Gold                             | 0.0821                    | 0.0749                     | 0.0621                     | 0.0440                      | 0.0673                    | -0.0901                    |
| Silver                           | -0.0324                   | -0.0099                    | -0.0345                    | 0.0010                      | -0.0396                   | 0.0676                     |
| Platinum                         | 0.0115                    | -0.0036                    | 0.0351                     | 0.0106                      | 0.0557                    | 0.0559                     |
| Orange Juice                     | 0.0285                    | 0.0198                     | 0.0373                     | 0.0236                      | 0.0235                    | 0.0409                     |
| Lumber                           | 0.0000                    | -0.0035                    | 0.0043                     | -0.0029                     | 0.0033                    | 0.0225                     |
| Live Cattle                      | 0.0286                    | 0.0437                     | 0.0091                     | 0.0596                      | 0.0151                    | 0.1179                     |
| S&P500                           | 0.0137                    | -0.0159                    | -0.0051                    | -0.0216                     | -0.0297                   | -0.0597                    |
| 10Y Treasury Bond                | 0.8359                    | 0.8473                     | 0.8470                     | 0.8580                      | 0.8566                    | 0.8819                     |

*Panel B (With Transaction Costs)*

|                                  | Forward<br>$\gamma = 0.1$ | Backward<br>$\gamma = 0.1$ | Forward<br>$\gamma = 0.25$ | Backward<br>$\gamma = 0.25$ | Forward<br>$\gamma = 0.5$ | Backward<br>$\gamma = 0.5$ |
|----------------------------------|---------------------------|----------------------------|----------------------------|-----------------------------|---------------------------|----------------------------|
| Rendimento Mensile Medio         | 0.0007                    | 0.0021                     | 0.0005                     | 0.0030                      | 0.0006                    | 0.0016                     |
| Deviazione Standard Mensile      | 0.0209                    | 0.0304                     | 0.0216                     | 0.0283                      | 0.0211                    | 0.0283                     |
| Sharpe Ratio Annuo               | 0.1094                    | 0.2388                     | 0.0848                     | 0.3642                      | 0.0956                    | 0.1938                     |
| Utilità Media-Varianza           | 0.0006                    | 0.0020                     | 0.0005                     | 0.0029                      | 0.0005                    | 0.0014                     |
| <b>Average Portfolio Weights</b> |                           |                            |                            |                             |                           |                            |
| Light Crude Oil                  | 0.0229                    | 0.0065                     | 0.0105                     | 0.0070                      | 0.0129                    | 0.0030                     |
| Corn                             | 0.1002                    | 0.0651                     | 0.0537                     | 0.0626                      | 0.0470                    | 0.0368                     |
| Soybeans                         | -0.0680                   | -0.0443                    | -0.0195                    | -0.0576                     | -0.0111                   | -0.0260                    |
| Wheat                            | -0.0630                   | -0.0301                    | -0.0302                    | -0.0209                     | -0.0403                   | -0.0161                    |
| Coffee                           | 0.0272                    | 0.0200                     | 0.0202                     | 0.0208                      | 0.0093                    | 0.0159                     |
| Cocoa                            | 0.0048                    | 0.0105                     | 0.0079                     | 0.0105                      | 0.0180                    | 0.0133                     |
| Sugar                            | 0.0249                    | 0.0150                     | 0.0098                     | 0.0124                      | 0.0082                    | 0.0055                     |
| Cotton No.2                      | 0.0146                    | 0.0123                     | -0.0066                    | 0.0123                      | -0.0002                   | -0.0043                    |
| Gold                             | 0.0712                    | 0.0613                     | 0.1346                     | 0.0585                      | 0.0635                    | 0.0081                     |
| Silver                           | -0.0025                   | 0.0053                     | -0.0447                    | 0.0044                      | -0.0108                   | 0.0191                     |
| Platinum                         | -0.0700                   | -0.0443                    | -0.0038                    | -0.0387                     | -0.0026                   | -0.0270                    |
| Orange Juice                     | 0.0121                    | 0.0229                     | 0.0080                     | 0.0170                      | 0.0221                    | 0.0169                     |
| Lumber                           | -0.0024                   | -0.0089                    | -0.0020                    | -0.0124                     | -0.0045                   | -0.0079                    |
| Live Cattle                      | 0.0551                    | 0.0447                     | 0.0350                     | 0.0519                      | 0.0068                    | 0.0662                     |
| S&P500                           | 0.0427                    | 0.0912                     | -0.0107                    | 0.0949                      | 0.0406                    | 0.0995                     |
| 10Y Treasury Bond                | 0.9225                    | 0.8584                     | 0.9309                     | 0.8635                      | 0.9346                    | 0.8856                     |

Table S6

**Optimal Asset Allocation – Stepwise Regression Models Based on Macro Principal Components + Commodity-Specific Factors + Aggregate Commodity Specific Factors (Always Included)**

*Panel A (No Transaction Costs)*

|                                  | Forward<br>$\gamma = 0.1$ | Backward<br>$\gamma = 0.1$ | Forward<br>$\gamma = 0.25$ | Backward<br>$\gamma = 0.25$ | Forward<br>$\gamma = 0.5$ | Backward<br>$\gamma = 0.5$ |
|----------------------------------|---------------------------|----------------------------|----------------------------|-----------------------------|---------------------------|----------------------------|
| Average Realized Return          | -0.0042                   | -0.0032                    | -0.0034                    | -0.0032                     | -0.0034                   | -0.0018                    |
| Realized Standard Deviation      | 0.0378                    | 0.0376                     | 0.0366                     | 0.0406                      | 0.0366                    | 0.0374                     |
| Annualized Sharpe Ratio          | -0.3878                   | -0.2975                    | -0.3183                    | -0.2731                     | -0.3179                   | -0.1663                    |
| Realized Average MV Utility      | -0.0043                   | -0.0033                    | -0.0035                    | -0.0034                     | -0.0037                   | -0.0021                    |
| <b>Average Portfolio Weights</b> |                           |                            |                            |                             |                           |                            |
| Light Crude Oil                  | 0.0134                    | -0.0028                    | 0.0091                     | -0.0110                     | 0.0091                    | -0.0032                    |
| Corn                             | 0.0321                    | -0.0332                    | 0.0041                     | -0.0182                     | 0.0041                    | -0.0137                    |
| Soybeans                         | -0.0202                   | 0.0473                     | -0.0067                    | 0.0593                      | -0.0067                   | 0.0354                     |
| Wheat                            | -0.0208                   | 0.0133                     | -0.0010                    | 0.0115                      | -0.0010                   | 0.0138                     |
| Coffee                           | 0.0153                    | 0.0162                     | 0.0031                     | 0.0113                      | 0.0031                    | 0.0180                     |
| Cocoa                            | -0.0166                   | 0.0014                     | -0.0114                    | -0.0195                     | -0.0114                   | -0.0098                    |
| Sugar                            | -0.0178                   | 0.0044                     | -0.0142                    | 0.0051                      | -0.0142                   | 0.0091                     |
| Cotton No.2                      | -0.0007                   | 0.0236                     | 0.0174                     | 0.0489                      | 0.0174                    | 0.0346                     |
| Gold                             | 0.0102                    | -0.0115                    | 0.0198                     | 0.0101                      | 0.0198                    | 0.0021                     |
| Silver                           | 0.0224                    | 0.0293                     | 0.0141                     | 0.0209                      | 0.0141                    | 0.0272                     |
| Platinum                         | 0.0030                    | 0.0186                     | 0.0122                     | 0.0163                      | 0.0123                    | -0.0005                    |
| Orange Juice                     | -0.0166                   | 0.0071                     | -0.0183                    | -0.0027                     | -0.0183                   | -0.0046                    |
| Lumber                           | -0.0016                   | 0.0067                     | -0.0126                    | -0.0013                     | -0.0125                   | -0.0025                    |
| Live Cattle                      | 0.1806                    | 0.1012                     | 0.1680                     | 0.1401                      | 0.1681                    | 0.1075                     |
| S&P500                           | -0.0134                   | -0.0658                    | -0.0321                    | -0.1190                     | -0.0323                   | -0.0736                    |
| 10Y Treasury Bond                | 0.8306                    | 0.8443                     | 0.8485                     | 0.8482                      | 0.8486                    | 0.8602                     |

*Panel B (With Transaction Costs)*

|                                  | Forward<br>$\gamma = 0.1$ | Backward<br>$\gamma = 0.1$ | Forward<br>$\gamma = 0.25$ | Backward<br>$\gamma = 0.25$ | Forward<br>$\gamma = 0.5$ | Backward<br>$\gamma = 0.5$ |
|----------------------------------|---------------------------|----------------------------|----------------------------|-----------------------------|---------------------------|----------------------------|
| Rendimento Mensile Medio         | 0.0017                    | -0.0002                    | 0.0014                     | -0.0001                     | 0.0014                    | 0.0004                     |
| Deviazione Standard Mensile      | 0.0287                    | 0.0282                     | 0.0307                     | 0.0282                      | 0.0307                    | 0.0305                     |
| Sharpe Ratio Annuo               | 0.2061                    | -0.0277                    | 0.1595                     | -0.0101                     | 0.1531                    | 0.0461                     |
| Utilità Media-Varianza           | 0.0017                    | -0.0003                    | 0.0013                     | -0.0002                     | 0.0011                    | 0.0002                     |
| <b>Average Portfolio Weights</b> |                           |                            |                            |                             |                           |                            |
| Light Crude Oil                  | 0.0305                    | 0.0210                     | 0.0462                     | 0.0252                      | 0.0436                    | 0.0130                     |
| Corn                             | -0.0460                   | -0.0443                    | 0.0374                     | -0.0403                     | 0.0418                    | -0.0043                    |
| Soybeans                         | -0.0119                   | 0.0295                     | -0.0524                    | 0.0297                      | -0.0547                   | 0.0055                     |
| Wheat                            | 0.0125                    | -0.0101                    | -0.0167                    | -0.0134                     | -0.0134                   | -0.0212                    |
| Coffee                           | 0.0122                    | 0.0056                     | 0.0168                     | 0.0075                      | 0.0155                    | 0.0130                     |
| Cocoa                            | 0.0762                    | 0.0345                     | 0.0653                     | 0.0286                      | 0.0648                    | 0.0340                     |
| Sugar                            | 0.0204                    | -0.0151                    | 0.0042                     | -0.0111                     | 0.0010                    | 0.0002                     |
| Cotton No.2                      | 0.0087                    | 0.0216                     | 0.0502                     | 0.0306                      | 0.0498                    | 0.0033                     |
| Gold                             | 0.0889                    | -0.0482                    | 0.1503                     | -0.0470                     | 0.1624                    | 0.0123                     |
| Silver                           | 0.0632                    | 0.0444                     | 0.0666                     | 0.0467                      | 0.0605                    | 0.0380                     |
| Platinum                         | -0.1296                   | -0.0123                    | -0.1822                    | -0.0207                     | -0.1789                   | -0.0697                    |
| Orange Juice                     | 0.0000                    | 0.0333                     | -0.0099                    | 0.0346                      | -0.0137                   | 0.0182                     |
| Lumber                           | -0.0341                   | 0.0080                     | -0.0639                    | 0.0079                      | -0.0673                   | 0.0008                     |
| Live Cattle                      | -0.2218                   | 0.0062                     | -0.2534                    | 0.0037                      | -0.2612                   | -0.0288                    |
| S&P500                           | 0.2668                    | 0.0967                     | 0.2742                     | 0.0860                      | 0.2816                    | 0.1493                     |
| 10Y Treasury Bond                | 0.8640                    | 0.8291                     | 0.8675                     | 0.8320                      | 0.8680                    | 0.8365                     |
